# Supplementary material for: Using a dark logic model to explore adverse effects in audit and feedback: a qualitative study of gaming in colonoscopy
Source: HighWire-hosted journal article supplement (doi:10.1136/bmjqs-2021-013588), 2021-12-10
Supplement: bmjqs-2021-013588supp001_data_supplement.pdf [file bmjqs-2021-013588supp001_data_supplement.pdf]

## Topic Guide Ev4

**Qualitative Study Interview Topic Guide Endoscopists [version 4, 29/01/2020]**

NED:APRIQOT Qualitative Study

IRAS ID 251770

## 1) Introduction

- a. Tell me a bit about yourself as an endoscopist?
  - i. Demographics: Age, Gender, Professional background
  - ii. Professional: Role, experience, time in unit, Background, Lists/week
- b. What do you think about your own endoscopy performance?
  - i. How was your training? Challenges and difficulties

## 2) Feedback and targeted behaviours in endoscopy

- a. Tell me about a time when you received written feedback about your performance in endoscopy?

|                                                                                                                                     | Feedback Intervention Theory                     | Theory Planned Behaviour |
|-------------------------------------------------------------------------------------------------------------------------------------|--------------------------------------------------|--------------------------|
| Tell me about the content of the feedback?                                                                                          |                                                  |                          |
| <b>Task motivation process</b>                                                                                                      |                                                  |                          |
| Were any specific behaviours targeted?<br>Was a discrepancy identified?<br>Any action or behaviour change required?                 | Feedback standard discrepancy.                   |                          |
| Did changing behaviour feel effective?                                                                                              | Perception of discrepancy reduction with effort. |                          |
| Did you believe the change would be successful?                                                                                     | Task beliefs of success.                         | Behavioural beliefs.     |
| What outcome do you think would happen if you changed behaviour?<br>How likely do you think success would be with this action plan? |                                                  | Behavioural beliefs.     |
| <b>Meta-tasks and the self</b>                                                                                                      |                                                  |                          |
| How did receiving this feedback feel? Why?                                                                                          | Self esteem                                      |                          |
| Was it in keeping with your own goals?<br>Any conflict with your own goals? Why?                                                    | Self goals                                       |                          |
| Would changing your behaviour impact on your relationship with any others?<br>Others approval or disapproval?                       | Self goals                                       | Normative beliefs        |
| How much control did you have over this behaviour?                                                                                  | Self goal of control                             | Control beliefs          |
| What barriers stopped you from performing this behaviour?                                                                           |                                                  | Control beliefs          |
| Prompts: Skills, Time, Cooperation of others, Resources, environment, enables/barriers                                              |                                                  | Control beliefs          |
| <b>Task learning processes and task dominance</b>                                                                                   |                                                  |                          |
| Was the behaviour easy or automatic?                                                                                                | Task dominance                                   | Control beliefs          |
| Did you have to learn something new?<br>If so, how was this learnt? (training/mentor/peers)                                         | Learning                                         |                          |
| Did this new behaviour interfere with your performance? How?                                                                        | Interference                                     |                          |
| How did you find this experience? Why?                                                                                              | Positive or negative learning experience         |                          |

## Topic Guide Ev4

- 3) Tell me about a time when you have been observed scoping/observed others scoping, or discussed performance? (Normative beliefs)
- When would you seek out being observed? How, what opportunities are there?
  - Feeling:
    - Would having a buddy be appreciated/concerning?
    - Do you feel isolated as an independent endoscopist?
  - Can detection be improved with buddying?
  - Skill sharing:
    - How easy is it?
    - What are the barriers to sharing skills currently?
  - DO you have time for your own learning and reflection on practice?
- 4) Here's an example of feedback we may use, using your performance data. Talk me through your first impression?

| BCI element     | Question                                                                                                                           | Theoretical basis                                                |
|-----------------|------------------------------------------------------------------------------------------------------------------------------------|------------------------------------------------------------------|
| KPI             | Tell me what you understand by these numbers?                                                                                      | Task motivation, able to identify feedback standard discrepancy. |
| Recommendation  | How credible are the targets you have been set?<br>Do they apply to you? Why?                                                      | Self                                                             |
|                 | Are these targets achievable? Why?                                                                                                 | Control beliefs                                                  |
|                 | Which elements are you most focussed on?<br>Prompt green, amber and red highlighted numbers.                                       | Task motivation                                                  |
| Action plans    | What change is required from your report?<br>Do you believe you will change behaviour?                                             | Task motivation                                                  |
|                 | What outcome do you think would happen if you changed behaviour?<br>How likely do you think this is?                               | Task motivation                                                  |
|                 | Is the plan in keeping with your own goals?<br>Any conflict with own goals?                                                        | Meta-task                                                        |
|                 | Would changing your behaviour impact on your relationship with any others?<br>Others approval or disapproval?                      | Meta-task, normative beliefs                                     |
|                 | How comfortable are you engaging the nursing team regarding reminders and prompts?<br>Does this impact on your role/relationships? | Normative beliefs, Control.                                      |
|                 | How much control did you have over this behaviour?                                                                                 | Meta-task, control beliefs                                       |
|                 | What barriers stopped you from performing this behaviour?                                                                          | Meta-task, control beliefs                                       |
|                 | Will changing this behaviour be easy or automatic?                                                                                 | Task learning                                                    |
|                 | Will you have to learn something new?                                                                                              | Task learning                                                    |
|                 | Will this new behaviour interfere with your performance? How?                                                                      | Task learning                                                    |
|                 |                                                                                                                                    |                                                                  |
| Feedback source | How credible do you think about the source of the feedback is?<br>Do you believe this data?                                        | Behavioural beliefs                                              |
| Trend over time | What do you think about your trend over time?                                                                                      |                                                                  |
|                 | Is this significant change?                                                                                                        |                                                                  |

## Topic Guide Ev4

|                                                               |                                                                                                           |                                                                          |
|---------------------------------------------------------------|-----------------------------------------------------------------------------------------------------------|--------------------------------------------------------------------------|
|                                                               | How motivated would you be to change if you saw improvement or deterioration in performance?              | Task motivation effort and discrepancy reduction. Behavioural beliefs.   |
|                                                               | Do you think you would see an improvement in your performance next month?                                 | Task motivation belief in success. Behavioural beliefs. Control beliefs. |
| Normative comparison:<br>National/<br>Subgroup/<br>Local data | What do you feel about performance being compared to other endoscopists?                                  | Self and affective response                                              |
|                                                               | Which comparison is most important to you?                                                                | Normative beliefs                                                        |
|                                                               | Are you motivated by unit data?<br>Who do you compare yourself to from unit data?<br>Is being average OK? | Normative beliefs                                                        |
|                                                               |                                                                                                           |                                                                          |
| Effort of BCI                                                 | How much effort is required to take in this information? Is it easily understood?                         | Meta-task – ease of intervention                                         |
|                                                               | How long would this take to review?<br>Where and when would you review it?                                | Meta-task – ease of intervention                                         |
|                                                               | Would you look at the further information?                                                                |                                                                          |
|                                                               | How much time would you be willing to look at more data each month?                                       |                                                                          |
|                                                               | Which is easier to interpret:<br>Prompt three versions: descriptive, table and extended table.            | Meta-task – ease of intervention                                         |
|                                                               | Would seeing your action plan trend over time be helpful?                                                 | Meta-task – ease of intervention                                         |

- 5) If areas arise not covered in depth by Feedback Intervention Theory or Theory of Planned Behaviour, use of the Theoretical Domains Framework to explore current practice, perceptions of behaviours and barriers:

- a. Skills
  - i. Interpersonal skills
  - ii. Coping strategies
- b. Beliefs about capabilities
  - i. Self-confidence and professional confidence
  - ii. Empowerment
  - iii. Optimism/pessimism
- c. Beliefs about consequences
  - i. Appraisal/evaluation/review
  - ii. Unrealistic optimism
- d. Memory, attention and decision-making processes
- e. Environmental context and resources
  - i. Resource availability
  - ii. Environmental stressors
  - iii. Person and environment interaction
  - iv. Knowledge of task environment
- f. Social influences
  - i. Social support
  - ii. Leadership
  - iii. Team working
  - iv. Organisational climate/culture

## Topic Guide Ev4

- v. Power/hierarchy
    - vi. Professional boundaries
    - vii. Management commitment
    - viii. Negotiation
  - g. Emotion
    - i. Cognitive overload
    - ii. Anxiety/depression
  - h. Behavioural regulation
    - i. Generating alternatives
    - ii. Project management
  - i. Nature of behaviours - Breaking habits
- 6) Thanks and concluding remarks
- a. Many thanks again for undertaking this interview, all your responses will remain anonymous in any dissemination of this work.
  - b. Have you any questions for me?
